# Supplementary material
Source: publisher site journal article supplement (https://www.dovepress.com/article/339981)

**Supplementary Table 1.** Association of the clinical characteristics with thrombocytopenia in patients with acute pancreatitis.

| Variables | β (95% CI) | p-value |
| --- | --- | --- |
| SOFA | 1.331 (1.241,1.427) | <0.001 |
| RBC (×1012/L) | 0.291 (0.204,0.417) | <0.001 |
| RDW (%) | 1.367 (1.232,1.517) | <0.001 |
| BUN(mmol/L) | 1.193 (1.145,1.243) | <0.001 |
| FIB (g/L) | 0.647 (0.553,0.757) | <0.001 |
| MB (ng/ml) | 1.001 (1.001,1.002) | <0.001 |
| Antithrombase III (%) | 0.935 (0.920,0.950) | <0.001 |
| Glucose(mmol/L) | 1.143 (1.088,1.200) | <0.001 |
| Acute Stage | 3.515 (2.004,6.164) | <0.001 |
| Etiology |  |  |
| [Biliary](D:/Dict/8.9.6.0/resultui/html/index.html#/javascript:;) | Reference |  |
| Hyperlipidemic | 0.496 (0.312,0.790) | 0.003 |
| Others | 0.756 (0.402,1.424) | 0.387 |
| DBC |  |  |
| Mild | Reference |  |
| Moderate | 1.681 (0.707,3.994) | 0.240 |
| Severe | 4.593 (1.982,10.643) | <0.001 |
| Critical | 8.945 (3.639,21.988) | <0.001 |
| IPN | 2.039 (1.289,3.225) | 0.002 |
| Suspected Infection | 1.361 (0.895,2.070) | 0.150 |
| Gender | 0.888 (0.573,1.378) | 0.597 |
| Weight (kg) | 0.992 (0.978,1.006) | 0.268 |
| High (cm) | 0.981 (0.955,1.007) | 0.153 |
| BMI | 0.985 (0.939,1.035) | 0.555 |
| Age (year) | 1.033 (1.017,1.050) | <0.001 |
| Platelet (×109/L) | 0.998 (0.996,1.000) | 0.063 |
| CRRT | 2.904 (1.448,5.823) | 0.003 |
| Vent | 5.872 (3.616,9.535) | <0.001 |
| Ca2+ (mmol/L) | 0.773 (0.318,1.878) | 0.570 |
| Cl- (mmol/L) | 1.077 (1.044,1.111) | <0.001 |
| Creatinine (μmol/L) | 1.005 (1.003,1.007) | <0.001 |
| Globulin (g/L) | 1.026 (0.991,1.063) | 0.140 |
| GGT (U/L) | 1.000 (0.999,1.001) | 0.703 |
| K+(mmol/L) | 2.458 (1.620,3.730) | <0.001 |
| LDH (mmol/L) | 1.000 (1.000,1.000) | 0.024 |
| Mg2+(mmol/L) | 5.411 (1.457,20.097) | 0.012 |
| Na+(mmol/L) | 1.104 (1.064,1.144) | <0.001 |
| P+(mmol/L) | 3.078 (1.839,5.152) | <0.001 |
| Total bilirubin (μmol/L) | 1.011 (1.005,1.017) | <0.001 |
| TP (g/L) | 0.989 (0.962,1.017) | 0.447 |
| ALB (g/L) | 0.935 (0.895,0.977) | 0.003 |
| MCH (pg) | 1.104 (0.998,1.222) | 0.055 |
| MCHC (g/L) | 0.978 (0.963,0.994) | 0.005 |
| MCV (fL) | 1.087 (1.044,1.132) | <0.001 |
| MONO % | 0.826 (0.758,0.899) | <0.001 |
| MPV (fL) | 1.455 (1.228,1.724) | <0.001 |
| NEUT % | 1.071 (1.040,1.102) | <0.001 |
| Thrombocytocrit (%) | 0.329 (0.036,3.010) | 0.325 |
| Platelet (×109/L) | 0.998 (0.996,1.000) | 0.060 |
| WBC (×109/L) | 1.025 (0.992,1.059) | 0.139 |
| LYM % | 0.939 (0.906,0.972) | <0.001 |
| HB (g/L) | 0.964 (0.953,0.976) | <0.001 |
| HCT | 0.000 (0.000,0.000) | <0.001 |
| Eosinophil % | 0.730 (0.564,0.944) | 0.017 |
| CRP (mg/L) | 1.004 (1.001,1.007) | 0.003 |
| Basophil % | 0.401 (0.118,1.365) | 0.144 |
| ALP (U/L) | 1.000 (0.999,1.001) | 0.865 |
| UA (μmol/L) | 1.003 (1.001,1.004) | <0.001 |
| ALT (U/L) | 1.002 (1.000,1.004) | 0.059 |
| AST (U/L) | 1.005 (1.002,1.008) | 0.002 |
| ChEs (KU/L) | 0.596 (0.512,0.693) | <0.001 |
| Total CO2(mmol/L) | 0.933 (0.885,0.983) | 0.009 |
| Total Cholesterol(mmol/L) | 0.564 (0.462,0.689) | <0.001 |
| Unconjugated Bilirubin (μmol/L) | 0.992 (0.967,1.018) | 0.551 |
| Amylase (U/L) | 0.999 (0.999,1.000) | 0.256 |
| IL-6 (ng/L) | 1.001 (1.000,1.002) | 0.031 |
| BNPP (pmol/L) | 1.004 (1.003,1.006) | <0.001 |
| PCT (μg/L) | 1.048 (1.023,1.072) | <0.001 |
| TG (mmol/L) | 1.008 (0.946,1.075) | 0.804 |
| CK (U/L) | 1.001 (1.000,1.001) | 0.003 |
| TT (s) | 1.031 (1.009,1.054) | 0.006 |
| PT (s) | 1.109 (1.048,1.174) | <0.001 |
| INR | 3.483 (1.711,7.093) | 0.001 |
| APTT (s) | 1.035 (1.018,1.052) | <0.001 |
| AVR (×109/L) | 0.993 (0.986,1.001) | 0.084 |
| Reticulocytes (%) | 1.206 (1.008,1.442) | 0.040 |
| Immature reticulocytes (%) | 1.046 (1.025,1.067) | <0.001 |
| LPS (U/L) | 1.000 (0.999,1.000) | 0.167 |
| TnI (ng/ml) | 3.310 (1.030,10.637) | 0.044 |
| TnT (ng/ml) | 9271.630 (102.671,837269.115) | <0.001 |
| D-dimer (mg/L) | 1.066 (1.030,1.102) | <0.001 |
| FDP (μg/mL) | 1.016 (1.006,1.027) | 0.003 |
| Ly (×109/L) | 0.957 (0.757,1.209) | 0.001 |
| Eosinophils (×109/L) | 0.575 (0.110,2.997) | 0.511 |
| Basophilic (×109/L) | 1.147 (0.000,2304.676) | 0.694 |
| Monocyte (×109/L) | 0.734 (0.482,1.116) | 0.148 |
| Neutrophil (×109/L) | 1.013 (0.987,1.039) | 0.331 |
| Temperature (℃) | 1.525 (1.195,1.948) | 0.001 |
| HR | 1.004 (0.998,1.010) | 0.171 |
| Respiratory Rate | 1.026 (1.004,1.049) | 0.022 |
| GCS | 0.714 (0.620,0.822) | <0.001 |
| MBP (mmHg) | 0.972 (0.953,0.991) | 0.004 |
| PO2(Pa) | 1.004 (0.996,1.011) | 0.308 |
| FiO2(Pa) | 1.074 (1.048,1.099) | <0.001 |
| Urine Output 24h (ml) | 1.000 (1.000,1.000) | 0.754 |
| PF ratio | 0.996 (0.994,0.999) | 0.003 |

**Supplementary Table 2.** DIC score.

|  | Thrombocytopenia | Non-Thrombocytopenia | p value |
| --- | --- | --- | --- |
|  | (n=107) | (n=487) |  |
| DIC score | 6( 6 ~ 7 ) | 4( 4 ~ 5 ) | <0.001 |
| FIB | 0( 0 ~ 0 ) | 0( 0 ~ 0 ) | <0.001 |
| PT | 2( 2 ~ 2 ) | 2( 2 ~ 2 ) | 0.047 |
| D-dimer | 3( 2 ~ 3 ) | 2( 2 ~ 3 ) | 0.001 |
| PLT | 2( 1 ~ 2 ) | 0( 0 ~ 0 ) | <0.001 |
| DIC (%) | 97( 90.7 % ) | 237( 48.7 % ) | <0.001 |

**Abbreviations**：

SOFA, sequential organ failure assessment; RBC, red blood cell; RDW, red cell distribution width; FIB, fibrinogen; MB, myohemoglobin; AP Type, acute pancreatitis type; DBC Type, determinant-based classification type; IPN, infection pancreatic necrosis; CRRT, continuous renal replacement therapy; GGT, gamma-glutamyl transferase; LDH, lactate dehydrogenase; TP, total protein; ALB, albumin; MCH, mean cell hemoglobin; MCHC, mean cell hemoglobin concentration; MCV, mean corpuscular volume; MONO %, Monocyte %; MPV, mean platelet volume; NEUT %, neutrophils %; WBC, white blood cell; LYM %, lymphocytes; HB hemoglobin; HCT, hematocrit; CRP, C-reactive protein; ALP, alkaline phosphatase; UA, uric acid; ALT, alanine aminotransferase; AST, aspartate aminotransferase; ChEs, cholinesterase; Total CO2, total carbon dioxide; IL-6, interleukin-6; BNPP, Pre-Brain Natriuretic Peptide; PCT, procalcitonin; TG, triglycerides; CK, creatine kinase; TT, thrombin time; PT, prothrombin time; INR, the international normalised ratio; APTT, activated partial thromboplastin time; AVR, absolute value of reticulocytes; LPS, lipase; TnI, troponin I; TnT, troponin T; FDP, fibrin degradation products; HR, heart rate; GCS, Glasgow Coma Scale; MBP, mean arterial pressure

**Supplementary Fig. 1** Dynamic nomogram.


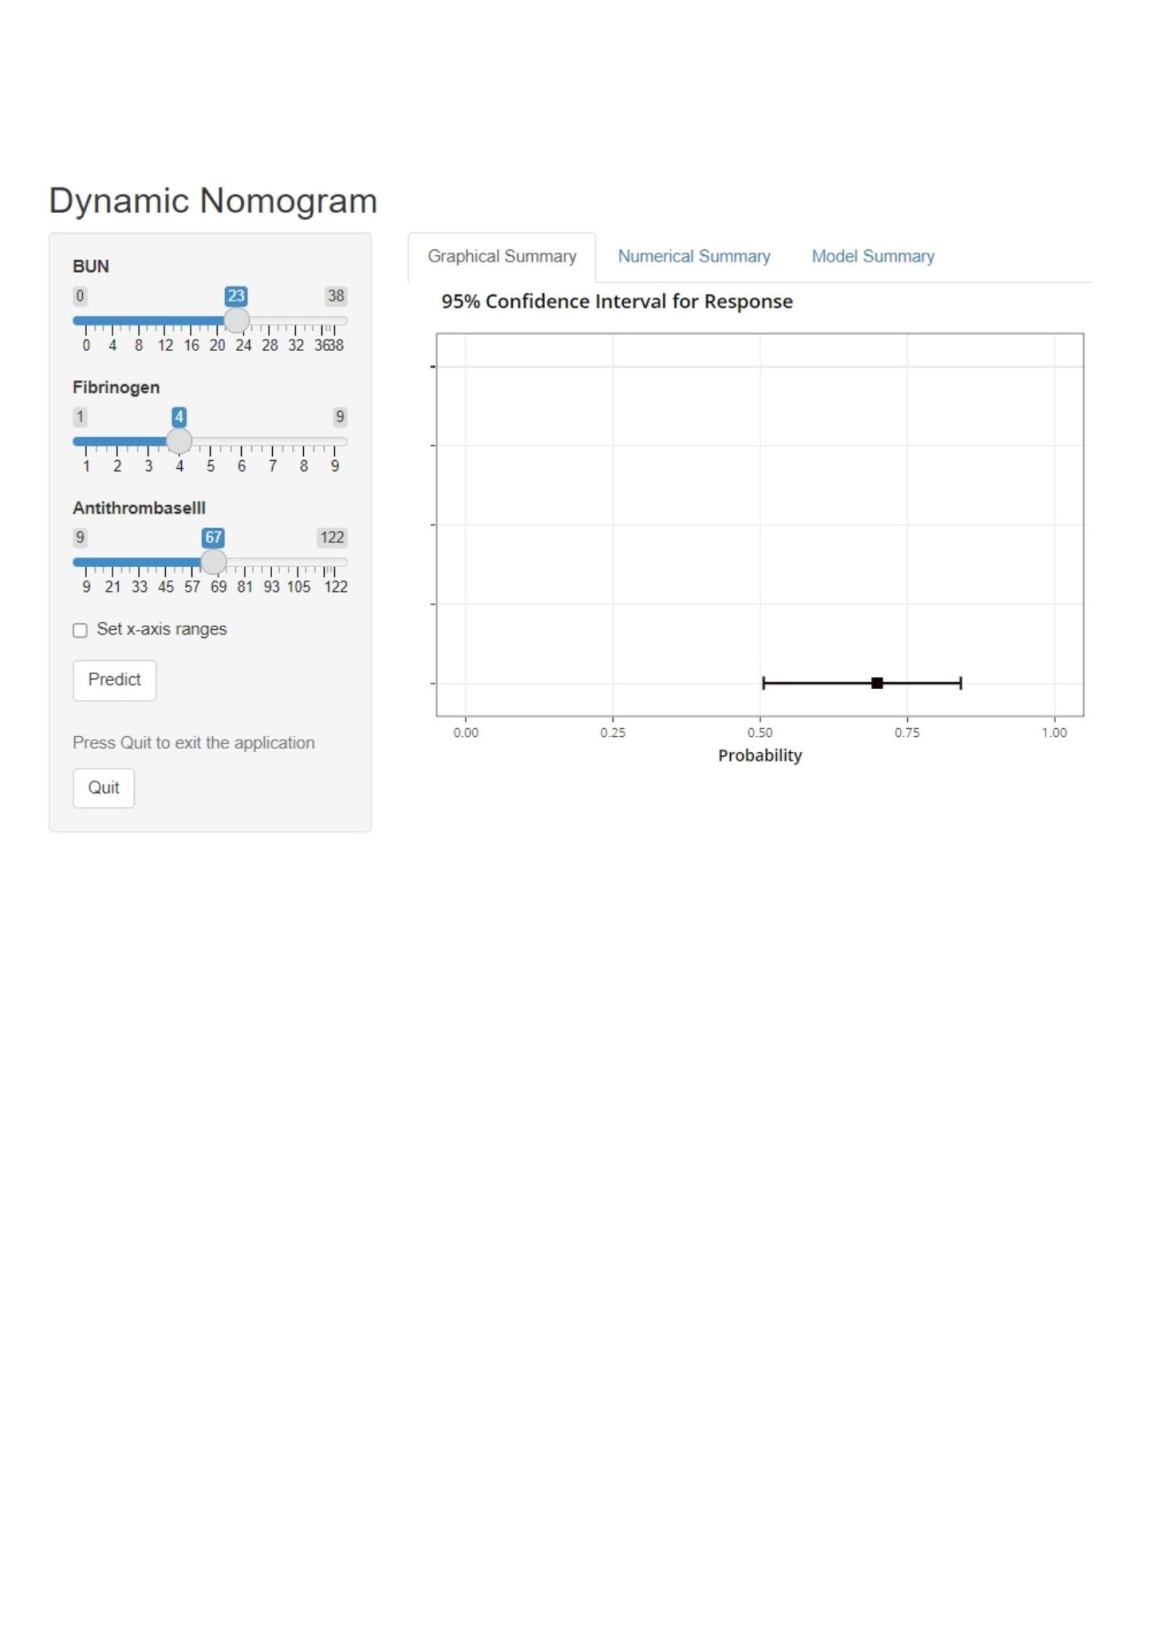

Supplement: Supplementary file 1 [file get_supplementary_file.php]
